# Supplementary material for: Increased Variation in Body Weight and Food Intake Is Related to Increased Dietary Fat but Not Increased Carbohydrate or Protein in Mice
Source: PubMed Central journal article supplement (PMC8963818; doi:10.3389/fnut.2022.835536), 2022-03-08
Supplement: Data_Sheet_1.pdf [file Data_Sheet_1.pdf]

**Table S1. The physiological parameters of mice used in the analysis of multiple regression between dietary protein content and CV of body weight.**

| Group | Strain  | Fat% | Protein% | Carbo% | Mean BW(g) | CV%   | Number of mice |
|-------|---------|------|----------|--------|------------|-------|----------------|
| 1     | C57BL/6 | 60   | 5        | 35     | 38.84      | 12.1  | 21             |
| 2     | C57BL/6 | 60   | 10       | 30     | 43.81      | 11.04 | 21             |
| 3     | C57BL/6 | 60   | 15       | 25     | 44.57      | 10.48 | 21             |
| 4     | C57BL/6 | 60   | 20       | 20     | 45.54      | 7.47  | 21             |
| 5     | C57BL/6 | 60   | 25       | 15     | 45.13      | 9.68  | 20             |
| 6     | C57BL/6 | 60   | 30       | 10     | 45.27      | 10.78 | 21             |
| 7     | C57BL/6 | 20   | 5        | 75     | 31.05      | 12.23 | 21             |
| 8     | C57BL/6 | 20   | 10       | 70     | 35.38      | 9.77  | 21             |
| 9     | C57BL/6 | 20   | 15       | 65     | 35.41      | 12.52 | 21             |
| 10    | C57BL/6 | 20   | 20       | 60     | 36.3       | 8.79  | 18             |
| 11    | C57BL/6 | 20   | 25       | 55     | 35.7       | 7.53  | 20             |
| 12    | C57BL/6 | 20   | 30       | 50     | 34.06      | 10.66 | 20             |
| 13    | BALB/c  | 60   | 5        | 35     | 29.55      | 4.57  | 8              |
| 14    | BALB/c  | 60   | 10       | 30     | 35.34      | 12.93 | 8              |
| 15    | BALB/c  | 60   | 15       | 25     | 34.17      | 13.44 | 8              |
| 16    | BALB/c  | 60   | 20       | 20     | 37.42      | 9.73  | 8              |
| 17    | BALB/c  | 60   | 25       | 15     | 34.42      | 8.57  | 8              |
| 18    | BALB/c  | 60   | 30       | 10     | 31.14      | 5.34  | 8              |
| 19    | C3H     | 60   | 5        | 35     | 32.34      | 4.82  | 8              |
| 20    | C3H     | 60   | 10       | 30     | 34.46      | 8.58  | 8              |
| 21    | C3H     | 60   | 15       | 25     | 37.75      | 8.84  | 8              |
| 22    | C3H     | 60   | 20       | 20     | 40.25      | 6.28  | 8              |
| 23    | C3H     | 60   | 25       | 15     | 38.8       | 6.24  | 8              |
| 24    | C3H     | 60   | 30       | 10     | 37.56      | 11.45 | 8              |
| 25    | DBA/2   | 60   | 5        | 35     | 36.38      | 8.81  | 8              |
| 26    | DBA/2   | 60   | 10       | 30     | 37.88      | 14.6  | 8              |
| 27    | DBA/2   | 60   | 15       | 25     | 38.42      | 10.27 | 8              |
| 28    | DBA/2   | 60   | 20       | 20     | 39.26      | 9.2   | 8              |
| 29    | DBA/2   | 60   | 25       | 15     | 38.2       | 7.54  | 8              |
| 30    | DBA/2   | 60   | 30       | 10     | 40.3       | 10.86 | 8              |
| 31    | FVB     | 60   | 5        | 35     | 36.38      | 14.71 | 8              |
| 32    | FVB     | 60   | 10       | 30     | 37.71      | 9.91  | 8              |
| 33    | FVB     | 60   | 15       | 25     | 37.26      | 5.14  | 8              |
| 34    | FVB     | 60   | 20       | 20     | 37.78      | 14    | 8              |
| 35    | FVB     | 60   | 25       | 15     | 35.08      | 10.92 | 7              |
| 36    | FVB     | 60   | 30       | 10     | 35.43      | 7.98  | 7              |

**Table S2. The physiological parameters of mice used in the analysis of multiple regression between dietary fat content and CV of body weight.**

| Group | Strain  | Fat% | Protein% | Carbo% | Mean BW(g) | CV%   | Number of mice |
|-------|---------|------|----------|--------|------------|-------|----------------|
| 1     | C57BL/6 | 10   | 10       | 80     | 34.44      | 11.24 | 20             |
| 2     | C57BL/6 | 30   | 10       | 60     | 39.21      | 9.2   | 20             |
| 3     | C57BL/6 | 40   | 10       | 50     | 40.74      | 8.18  | 19             |
| 4     | C57BL/6 | 50   | 10       | 40     | 43.38      | 9.82  | 19             |
| 5     | C57BL/6 | 70   | 10       | 20     | 40.13      | 8.81  | 20             |
| 6     | C57BL/6 | 80   | 10       | 10     | 38.8       | 9.21  | 20             |
| 7     | C57BL/6 | 8.3  | 25       | 66.7   | 33.32      | 9.16  | 20             |
| 8     | C57BL/6 | 25   | 25       | 50     | 35.25      | 10.86 | 20             |
| 9     | C57BL/6 | 33.3 | 25       | 41.7   | 39.3       | 8.92  | 20             |
| 10    | C57BL/6 | 41.7 | 25       | 33.3   | 45.02      | 9.65  | 19             |
| 11    | C57BL/6 | 58.3 | 25       | 16.7   | 46.71      | 10.54 | 20             |
| 12    | C57BL/6 | 66.6 | 25       | 8.4    | 39.73      | 9.71  | 20             |
| 13    | BALB/c  | 10   | 10       | 80     | 28.25      | 3.69  | 8              |
| 14    | BALB/c  | 30   | 10       | 60     | 30.56      | 8.39  | 8              |
| 15    | BALB/c  | 40   | 10       | 50     | 32.87      | 7.48  | 8              |
| 16    | BALB/c  | 50   | 10       | 40     | 35.44      | 10.95 | 8              |
| 17    | BALB/c  | 70   | 10       | 20     | 33.98      | 9.24  | 8              |
| 18    | BALB/c  | 80   | 10       | 10     | 33.28      | 8.38  | 8              |
| 19    | C3H     | 10   | 10       | 80     | 29.35      | 4.3   | 8              |
| 20    | C3H     | 30   | 10       | 60     | 34.84      | 7.87  | 8              |
| 21    | C3H     | 40   | 10       | 50     | 35.52      | 6.49  | 8              |
| 22    | C3H     | 50   | 10       | 40     | 37.2       | 6.46  | 8              |
| 23    | C3H     | 70   | 10       | 20     | 38.96      | 9.62  | 8              |
| 24    | C3H     | 80   | 10       | 10     | 38.22      | 10.06 | 8              |
| 25    | DBA/2   | 10   | 10       | 80     | 27         | 6.03  | 8              |
| 26    | DBA/2   | 30   | 10       | 60     | 31.28      | 8.6   | 8              |
| 27    | DBA/2   | 40   | 10       | 50     | 35.06      | 14.93 | 8              |
| 28    | DBA/2   | 50   | 10       | 40     | 38.6       | 13.26 | 8              |
| 29    | DBA/2   | 70   | 10       | 20     | 38.76      | 5.33  | 8              |
| 30    | DBA/2   | 80   | 10       | 10     | 39.1       | 10.8  | 8              |
| 31    | FVB     | 10   | 10       | 80     | 31.28      | 7.64  | 8              |
| 32    | FVB     | 30   | 10       | 60     | 32.35      | 12.02 | 8              |
| 33    | FVB     | 40   | 10       | 50     | 32.65      | 6.14  | 8              |
| 34    | FVB     | 50   | 10       | 40     | 37.27      | 12.68 | 9              |
| 35    | FVB     | 70   | 10       | 20     | 39.83      | 8.71  | 7              |
| 36    | FVB     | 80   | 10       | 10     | 39.8       | 7.47  | 8              |

**Table S3. The physiological parameters of mice used in the analysis of multiple regression between dietary protein content and CV of food intake.**

| Group | Strain  | Fat% | Protein% | Carbo% | Mean FI(g) | CV%   | Number of mice |
|-------|---------|------|----------|--------|------------|-------|----------------|
| 1     | C57BL/6 | 60   | 5        | 35     | 3.82       | 10.3  | 21             |
| 2     | C57BL/6 | 60   | 10       | 30     | 3.22       | 11.48 | 21             |
| 3     | C57BL/6 | 60   | 15       | 25     | 3.24       | 11.38 | 21             |
| 4     | C57BL/6 | 60   | 20       | 20     | 3.17       | 8.5   | 21             |
| 5     | C57BL/6 | 60   | 25       | 15     | 3.2        | 13.8  | 20             |
| 6     | C57BL/6 | 60   | 30       | 10     | 3.34       | 16.8  | 21             |
| 7     | C57BL/6 | 20   | 5        | 75     | 3.98       | 8.61  | 21             |
| 8     | C57BL/6 | 20   | 10       | 70     | 3.5        | 10.63 | 21             |
| 9     | C57BL/6 | 20   | 15       | 65     | 3.61       | 13.37 | 21             |
| 10    | C57BL/6 | 20   | 20       | 60     | 3.5        | 10.32 | 18             |
| 11    | C57BL/6 | 20   | 25       | 55     | 3.46       | 9.02  | 20             |
| 12    | C57BL/6 | 20   | 30       | 50     | 3.41       | 14.12 | 20             |
| 13    | BALB/c  | 60   | 5        | 35     | 4.27       | 11.14 | 8              |
| 14    | BALB/c  | 60   | 10       | 30     | 3.51       | 9.36  | 8              |
| 15    | BALB/c  | 60   | 15       | 25     | 3.62       | 16.34 | 8              |
| 16    | BALB/c  | 60   | 20       | 20     | 3.35       | 9.89  | 8              |
| 17    | BALB/c  | 60   | 25       | 15     | 3.27       | 8.05  | 8              |
| 18    | BALB/c  | 60   | 30       | 10     | 2.97       | 9.32  | 8              |
| 19    | C3H     | 60   | 5        | 35     | 4.87       | 10.67 | 8              |
| 20    | C3H     | 60   | 10       | 30     | 4.55       | 28.21 | 8              |
| 21    | C3H     | 60   | 15       | 25     | 4.49       | 18.56 | 8              |
| 22    | C3H     | 60   | 20       | 20     | 4.6        | 10.42 | 8              |
| 23    | C3H     | 60   | 25       | 15     | 4.58       | 10.76 | 8              |
| 24    | C3H     | 60   | 30       | 10     | 4.21       | 19.23 | 8              |
| 25    | DBA/2   | 60   | 5        | 35     | 3.87       | 11.12 | 8              |
| 26    | DBA/2   | 60   | 10       | 30     | 3.42       | 8.4   | 8              |
| 27    | DBA/2   | 60   | 15       | 25     | 3.49       | 8.1   | 8              |
| 28    | DBA/2   | 60   | 20       | 20     | 3.5        | 9.4   | 8              |
| 29    | DBA/2   | 60   | 25       | 15     | 3.53       | 10.68 | 8              |
| 30    | DBA/2   | 60   | 30       | 10     | 3.61       | 8.69  | 8              |
| 31    | FVB     | 60   | 5        | 35     | 4.27       | 15.32 | 8              |
| 32    | FVB     | 60   | 10       | 30     | 3.62       | 14.64 | 8              |
| 33    | FVB     | 60   | 15       | 25     | 3.54       | 12.56 | 8              |
| 34    | FVB     | 60   | 20       | 20     | 3.38       | 11.47 | 8              |
| 35    | FVB     | 60   | 25       | 15     | 3.49       | 10.33 | 7              |
| 36    | FVB     | 60   | 30       | 10     | 3.48       | 19.12 | 7              |

**Table S4. The physiological parameters of mice used in the analysis of multiple regression between dietary fat content and CV of food intake.**

| Group | Strain  | Fat% | Protein% | Carbo% | Mean FI(g) | CV%   | Number of mice |
|-------|---------|------|----------|--------|------------|-------|----------------|
| 1     | C57BL/6 | 10   | 10       | 80     | 3.67       | 11.04 | 20             |
| 2     | C57BL/6 | 30   | 10       | 60     | 3.58       | 12.62 | 20             |
| 3     | C57BL/6 | 40   | 10       | 50     | 3.56       | 12.07 | 19             |
| 4     | C57BL/6 | 50   | 10       | 40     | 3.82       | 22.54 | 19             |
| 5     | C57BL/6 | 70   | 10       | 20     | 3.05       | 16.48 | 20             |
| 6     | C57BL/6 | 80   | 10       | 10     | 2.59       | 10.07 | 20             |
| 7     | C57BL/6 | 8.3  | 25       | 66.7   | 3.51       | 8.96  | 20             |
| 8     | C57BL/6 | 25   | 25       | 50     | 3.35       | 8.43  | 20             |
| 9     | C57BL/6 | 33.3 | 25       | 41.7   | 3.2        | 9.71  | 20             |
| 10    | C57BL/6 | 41.7 | 25       | 33.3   | 3.31       | 12.12 | 19             |
| 11    | C57BL/6 | 58.3 | 25       | 16.7   | 3.25       | 18.06 | 20             |
| 12    | C57BL/6 | 66.6 | 25       | 8.4    | 2.96       | 9.1   | 20             |
| 13    | BALB/c  | 10   | 10       | 80     | 4.03       | 7.04  | 8              |
| 14    | BALB/c  | 30   | 10       | 60     | 3.69       | 12.55 | 8              |
| 15    | BALB/c  | 40   | 10       | 50     | 3.89       | 10.32 | 8              |
| 16    | BALB/c  | 50   | 10       | 40     | 4.15       | 7.58  | 8              |
| 17    | BALB/c  | 70   | 10       | 20     | 3.15       | 9.51  | 8              |
| 18    | BALB/c  | 80   | 10       | 10     | 2.82       | 8.2   | 8              |
| 19    | C3H     | 10   | 10       | 80     | 4.95       | 5.44  | 8              |
| 20    | C3H     | 30   | 10       | 60     | 4.51       | 3.15  | 8              |
| 21    | C3H     | 40   | 10       | 50     | 4.99       | 16.12 | 8              |
| 22    | C3H     | 50   | 10       | 40     | 5.27       | 11.5  | 8              |
| 23    | C3H     | 70   | 10       | 20     | 4.         | 8.56  | 8              |
| 24    | C3H     | 80   | 10       | 10     | 3.17       | 6.25  | 8              |
| 25    | DBA/2   | 10   | 10       | 80     | 4.21       | 10.12 | 8              |
| 26    | DBA/2   | 30   | 10       | 60     | 3.72       | 9.53  | 8              |
| 27    | DBA/2   | 40   | 10       | 50     | 3.76       | 9.77  | 8              |
| 28    | DBA/2   | 50   | 10       | 40     | 3.74       | 12.94 | 8              |
| 29    | DBA/2   | 70   | 10       | 20     | 3.23       | 7.44  | 8              |
| 30    | DBA/2   | 80   | 10       | 10     | 3.17       | 6.92  | 8              |
| 31    | FVB     | 10   | 10       | 80     | 4.21       | 10.02 | 8              |
| 32    | FVB     | 30   | 10       | 60     | 3.96       | 17.14 | 8              |
| 33    | FVB     | 40   | 10       | 50     | 3.72       | 8.88  | 8              |
| 34    | FVB     | 50   | 10       | 40     | 3.58       | 11.96 | 9              |
| 35    | FVB     | 70   | 10       | 20     | 3.5        | 21.42 | 7              |
| 36    | FVB     | 80   | 10       | 10     | 3.05       | 8.08  | 8              |

**Table S5. 60%fat and different protein content diet composition table.**

| Product #                | 5 kcal% Protein |             | 10 kcal % Protein |             | 15 kcal % Protein |             | 20 kcal % Protein |             | 25 kcal % Protein |             | 30 kcal % Protein |             |
|--------------------------|-----------------|-------------|-------------------|-------------|-------------------|-------------|-------------------|-------------|-------------------|-------------|-------------------|-------------|
|                          | gm%             | kcal%       | gm%               | kcal%       | gm%               | kcal%       | kcal%             | kcal%       | gm%               | kcal%       | gm%               | kcal%       |
| <b>Protein</b>           | <b>7</b>        | <b>5</b>    | <b>13</b>         | <b>10</b>   | <b>20</b>         | <b>15</b>   | <b>26</b>         | <b>20</b>   | <b>33</b>         | <b>25</b>   | <b>39</b>         | <b>30</b>   |
| Carbohydrate             | 46              | 35          | 39                | 30          | 33                | 25          | 26                | 20          | 20                | 15          | 13                | 10          |
| <b>Fat</b>               | <b>35</b>       | <b>60</b>   | <b>35</b>         | <b>60</b>   | <b>35</b>         | <b>60</b>   | <b>35</b>         | <b>60</b>   | <b>35</b>         | <b>60</b>   | <b>35</b>         | <b>60</b>   |
| Total                    |                 | 100         |                   | 100         |                   | 100         |                   | 100         |                   | 100         |                   | 100         |
| kcal/gm                  | 5.2             |             | 5.2               |             | 5.2               |             | 5.2               |             | 5.2               |             | 5.1               |             |
| <b>Ingredient</b>        | <b>gm</b>       | <b>kcal</b> | <b>gm</b>         | <b>kcal</b> | <b>gm</b>         | <b>kcal</b> | <b>gm</b>         | <b>kcal</b> | <b>gm</b>         | <b>kcal</b> | <b>gm</b>         | <b>kcal</b> |
| Casein                   | 50              | 200         | 100               | 400         | 150               | 600         | 200               | 800         | 250               | 1000        | 300               | 1200        |
| L-Cystine                | 0.75            | 3           | 1.5               | 6           | 2.25              | 9           | 3                 | 12          | 3.75              | 15          | 4.5               | 18          |
| Corn Starch              | 145             | 580         | 114.3             | 457         | 68.6              | 274         | 17.8              | 71          | 0                 | 0           | 0                 | 0           |
| Maltodextrin 10          | 150             | 600         | 130               | 520         | 125               | 500         | 125               | 500         | 92                | 368         | 41.2              | 165         |
| Sucrose                  | 51              | 204         | 51                | 204         | 51                | 204         | 51                | 204         | 51                | 204         | 51                | 204         |
| Cellulose, BW200         | 50              | 0           | 50                | 0           | 50                | 0           | 50                | 0           | 50                | 0           | 50                | 0           |
| Cocoa Butter             | 75              | 675         | 75                | 675         | 75                | 675         | 75                | 675         | 75                | 675         | 75                | 675         |
| Coconut Oil              | 5               | 45          | 5                 | 45          | 5                 | 45          | 5                 | 45          | 5                 | 45          | 5                 | 45          |
| Menhaden Oil             | 5               | 45          | 5                 | 45          | 5                 | 45          | 5                 | 45          | 5                 | 45          | 5                 | 45          |
| Palm Oil                 | 165             | 1485        | 165               | 1485        | 165               | 1485        | 165               | 1485        | 165               | 1485        | 165               | 1485        |
| Safflower Oil            | 20              | 180         | 20                | 180         | 20                | 180         | 20                | 180         | 20                | 180         | 20                | 180         |
| Mineral Mix, S10026      | 10              | 0           | 10                | 0           | 10                | 0           | 10                | 0           | 10                | 0           | 10                | 0           |
| DiCalcium Phosphate      | 13              | 0           | 13                | 0           | 13                | 0           | 13                | 0           | 13                | 0           | 13                | 0           |
| Calcium Carbonate        | 5.5             | 0           | 5.5               | 0           | 5.5               | 0           | 5.5               | 0           | 5.5               | 0           | 5.5               | 0           |
| Potassium Citrate, 1 H2O | 16.5            | 0           | 16.5              | 0           | 16.5              | 0           | 16.5              | 0           | 16.5              | 0           | 16.5              | 0           |
| Vitamin Mix, V10001      | 10              | 40          | 10                | 40          | 10                | 40          | 10                | 40          | 10                | 40          | 10                | 40          |
| Choline Bitartrate       | 2               | 0           | 2                 | 0           | 2                 | 0           | 2                 | 0           | 2                 | 0           | 2                 | 0           |
| FD&C Yellow Dye #5       | 0               | 0           | 0                 | 0           | 0                 | 0           | 0                 | 0           | 0                 | 0           | 0                 | 0           |
| FD&C Red Dye #40         | 0.0125          | 0           | 0.05              | 0           | 0.075             | 0           | 0.125             | 0           | 0.175             | 0           | 0.2               | 0           |
| FD&C Blue Dye #1         | 0               | 0           | 0                 | 0           | 0                 | 0           | 0                 | 0           | 0                 | 0           | 0                 | 0           |
| <b>Total</b>             | <b>773.763</b>  | <b>4057</b> | <b>773.85</b>     | <b>4057</b> | <b>773.925</b>    | <b>4057</b> | <b>773.925</b>    | <b>4057</b> | <b>773.925</b>    | <b>4057</b> | <b>773.925</b>    | <b>4057</b> |

**Table S6. 20%fat and different protein content diet composition table.**

| Product #                | 5 kcal% Protein |             | 10 kcal % Protein |             | 15 kcal % Protein |             | 20 kcal % Protein |             | 25 kcal % Protein |             | 30 kcal % Protein |             |
|--------------------------|-----------------|-------------|-------------------|-------------|-------------------|-------------|-------------------|-------------|-------------------|-------------|-------------------|-------------|
|                          | gm%             | kcal%       | gm%               | kcal%       | gm%               | kcal%       | kcal%             | kcal%       | gm%               | kcal%       | gm%               | kcal%       |
| <b>Protein</b>           | <b>5</b>        | <b>5</b>    | <b>10</b>         | <b>10</b>   | <b>15</b>         | <b>15</b>   | <b>20</b>         | <b>20</b>   | <b>25</b>         | <b>25</b>   | <b>30</b>         | <b>30</b>   |
| Carbohydrate             | 76              | 75          | 71                | 70          | 66                | 65          | 61                | 60          | 56                | 55          | 51                | 50          |
| <b>Fat</b>               | <b>9</b>        | <b>20</b>   | <b>9</b>          | <b>20</b>   | <b>9</b>          | <b>20</b>   | <b>9</b>          | <b>20</b>   | <b>9</b>          | <b>20</b>   | <b>9</b>          | <b>20</b>   |
| Total                    |                 | 100         |                   | 100         |                   | 100         |                   | 100         |                   | 100         |                   | 100         |
| kcal/gm                  | 4.1             |             | 4.1               |             | 4.1               |             | 4.1               |             | 4.1               |             | 4.1               |             |
| <b>Ingredient</b>        | <b>gm</b>       | <b>kcal</b> | <b>gm</b>         | <b>kcal</b> | <b>gm</b>         | <b>kcal</b> | <b>gm</b>         | <b>kcal</b> | <b>gm</b>         | <b>kcal</b> | <b>gm</b>         | <b>kcal</b> |
| Casein                   | 50              | 200         | 100               | 400         | 150               | 600         | 200               | 800         | 250               | 1000        | 300               | 1200        |
| L-Cystine                | 0.75            | 3           | 1.5               | 6           | 2.25              | 9           | 3                 | 12          | 3.75              | 15          | 4.5               | 18          |
| Corn Starch              | 600             | 2400        | 549.3             | 2197        | 498.5             | 1994        | 447.7             | 1791        | 397               | 1588        | 346.2             | 1385        |
| Maltodextrin 10          | 100             | 400         | 100               | 400         | 100               | 400         | 100               | 400         | 100               | 400         | 100               | 400         |
| Sucrose                  | 51              | 204         | 51                | 204         | 51                | 204         | 51                | 204         | 51                | 204         | 51                | 204         |
| Cellulose, BW200         | 50              | 0           | 50                | 0           | 50                | 0           | 50                | 0           | 50                | 0           | 50                | 0           |
| Cocoa Butter             | 25              | 225         | 25                | 225         | 25                | 225         | 25                | 225         | 25                | 225         | 25                | 225         |
| Coconut Oil              | 1.7             | 15          | 1.7               | 15          | 1.7               | 15          | 1.7               | 15          | 1.7               | 15          | 1.7               | 15          |
| Menhaden Oil             | 1.7             | 15          | 1.7               | 15          | 1.7               | 15          | 1.7               | 15          | 1.7               | 15          | 1.7               | 15          |
| Palm Oil                 | 55              | 495         | 55                | 495         | 55                | 495         | 55                | 495         | 55                | 495         | 55                | 495         |
| Safflower Oil            | 6.6             | 59          | 6.6               | 59          | 6.6               | 59          | 6.6               | 59          | 6.6               | 59          | 6.6               | 59          |
| Mineral Mix, S10026      | 10              | 0           | 10                | 0           | 10                | 0           | 10                | 0           | 10                | 0           | 10                | 0           |
| DiCalcium Phosphate      | 13              | 0           | 13                | 0           | 13                | 0           | 13                | 0           | 13                | 0           | 13                | 0           |
| Calcium Carbonate        | 5.5             | 0           | 5.5               | 0           | 5.5               | 0           | 5.5               | 0           | 5.5               | 0           | 5.5               | 0           |
| Potassium Citrate, 1 H2O | 16.5            | 0           | 16.5              | 0           | 16.5              | 0           | 16.5              | 0           | 16.5              | 0           | 16.5              | 0           |
| Vitamin Mix, V10001      | 10              | 40          | 10                | 40          | 10                | 40          | 10                | 40          | 10                | 40          | 10                | 40          |
| Choline Bitartrate       | 2               | 0           | 2                 | 0           | 2                 | 0           | 2                 | 0           | 2                 | 0           | 2                 | 0           |
| FD&C Yellow Dye #5       | 0.0063          | 0           | 0.025             | 0           | 0.0375            | 0           | 0.0625            | 0           | 0.0875            | 0           | 0.1               | 0           |
| FD&C Red Dye #40         | 0.0063          | 0           | 0.025             | 0           | 0.0375            | 0           | 0.0625            | 0           | 0.0875            | 0           | 0.1               | 0           |
| FD&C Blue Dye #1         | 0               | 0           | 0                 | 0           | 0                 | 0           | 0                 | 0           | 0                 | 0           | 0                 | 0           |
| <b>Total</b>             | <b>998.76</b>   | <b>4057</b> | <b>998.85</b>     | <b>4057</b> | <b>998.83</b>     | <b>4057</b> | <b>998.83</b>     | <b>4057</b> | <b>998.83</b>     | <b>4057</b> | <b>998.9</b>      | <b>4057</b> |

**Table S7. 10% protein and different fat content diet composition table.**

| Product #                | 10 kcal% Fat |             | 30 kcal% Fat  |             | 40 kcal% Fat  |             | 50 kcal% Fat  |             | 70 kcal% Fat  |             | 80 kcal% Fat  |             |
|--------------------------|--------------|-------------|---------------|-------------|---------------|-------------|---------------|-------------|---------------|-------------|---------------|-------------|
|                          | gm%          | kcal%       | gm%           | kcal%       | gm%           | kcal%       | kcal%         | kcal%       | gm%           | kcal%       | gm%           | kcal%       |
| <b>Protein</b>           | <b>10</b>    | <b>10</b>   | <b>11</b>     | <b>10</b>   | <b>11</b>     | <b>10</b>   | <b>12</b>     | <b>10</b>   | <b>14</b>     | <b>10</b>   | <b>15</b>     | <b>10</b>   |
| Carbohydrate             | 77           | 80          | 65            | 60          | 57            | 50          | 49            | 40          | 28            | 20          | 15            | 10          |
| <b>Fat</b>               | <b>4</b>     | <b>10</b>   | <b>14</b>     | <b>30</b>   | <b>20</b>     | <b>40</b>   | <b>27</b>     | <b>50</b>   | <b>44</b>     | <b>70</b>   | <b>54</b>     | <b>80</b>   |
| Total                    |              | 100         |               | 100         |               | 100         |               | 100         |               | 100         |               | 100         |
| kcal/gm                  | 3.8          |             | 4.3           |             | 4.6           |             | 4.9           |             | 5.7           |             | 6.1           |             |
| <b>Ingredient</b>        | <b>gm</b>    | <b>kcal</b> | <b>gm</b>     | <b>kcal</b> | <b>gm</b>     | <b>kcal</b> | <b>gm</b>     | <b>kcal</b> | <b>gm</b>     | <b>kcal</b> | <b>gm</b>     | <b>kcal</b> |
| Casein                   | 100          | 400         | 100           | 400         | 100           | 400         | 100           | 400         | 100           | 400         | 100           | 400         |
| L-Cystine                | 1.5          | 6           | 1.5           | 6           | 1.5           | 6           | 1.5           | 6           | 1.5           | 6           | 1.5           | 6           |
| Corn Starch              | 650.6        | 2602        | 448           | 1792        | 347           | 1388        | 245.5         | 982         | 43.2          | 173         | 0             | 0           |
| Maltodextrin 10          | 100          | 400         | 100           | 400         | 100           | 400         | 100           | 400         | 100           | 400         | 41.4          | 166         |
| Sucrose                  | 51           | 204         | 51            | 204         | 51            | 204         | 51            | 204         | 51            | 204         | 51            | 204         |
| Cellulose, BW200         | 50           | 0           | 50            | 0           | 50            | 0           | 50            | 0           | 50            | 0           | 50            | 0           |
| Cocoa Butter             | 12.5         | 113         | 37.5          | 338         | 50            | 450         | 62.5          | 563         | 87.5          | 788         | 100           | 900         |
| Coconut Oil              | 0.85         | 8           | 2.5           | 23          | 3.3           | 30          | 4.2           | 38          | 5.8           | 52          | 6.7           | 60          |
| Menhaden Oil             | 0.85         | 8           | 2.5           | 23          | 3.3           | 30          | 4.2           | 38          | 5.8           | 52          | 6.7           | 60          |
| Palm Oil                 | 27.5         | 248         | 82.5          | 743         | 110           | 990         | 137.5         | 1238        | 192.5         | 1733        | 220           | 1980        |
| Safflower Oil            | 3.3          | 30          | 10            | 90          | 13.3          | 120         | 16.6          | 149         | 23.3          | 210         | 26.7          | 240         |
| Mineral Mix, S10026      | 10           | 0           | 10            | 0           | 10            | 0           | 10            | 0           | 10            | 0           | 10            | 0           |
| DiCalcium Phosphate      | 13           | 0           | 13            | 0           | 13            | 0           | 13            | 0           | 13            | 0           | 13            | 0           |
| Calcium Carbonate        | 5.5          | 0           | 5.5           | 0           | 5.5           | 0           | 5.5           | 0           | 5.5           | 0           | 5.5           | 0           |
| Potassium Citrate, 1 H2O | 16.5         | 0           | 16.5          | 0           | 16.5          | 0           | 16.5          | 0           | 16.5          | 0           | 16.5          | 0           |
| Vitamin Mix, V10001      | 10           | 40          | 10            | 40          | 10            | 40          | 10            | 40          | 10            | 40          | 10            | 40          |
| Choline Bitartrate       | 2            | 0           | 2             | 0           | 2             | 0           | 2             | 0           | 2             | 0           | 2             | 0           |
| FD&C Yellow Dye #5       | 0.0063       | 0           | 0.025         | 0           | 0.0375        | 0           | 0.0625        | 0           | 0.0875        | 0           | 0.125         | 0           |
| FD&C Red Dye #40         | 0            | 0           | 0             | 0           | 0             | 0           | 0             | 0           | 0             | 0           | 0             | 0           |
| FD&C Blue Dye #1         | 0.0063       | 0           | 0.025         | 0           | 0.0375        | 0           | 0.0625        | 0           | 0.0875        | 0           | 0.125         | 0           |
| <b>Total</b>             | <b>1055</b>  | <b>4057</b> | <b>942.55</b> | <b>4057</b> | <b>886.48</b> | <b>4057</b> | <b>830.13</b> | <b>4057</b> | <b>717.78</b> | <b>4057</b> | <b>661.25</b> | <b>4057</b> |

**Table S8. 25% protein and different fat content diet composition table.**

| Product #                | 8.3 kcal% Fat |             | 25 kcal% Fat  |             | 33.3 kcal% Fat |             | 41.7 kcal% Fat |             | 58.3 kcal% Fat |             | 66.6 kcal% Fat |             |
|--------------------------|---------------|-------------|---------------|-------------|----------------|-------------|----------------|-------------|----------------|-------------|----------------|-------------|
|                          | gm%           | kcal%       | gm%           | kcal%       | gm%            | kcal%       | kcal%          | kcal%       | gm%            | kcal%       | gm%            | kcal%       |
| <b>Protein</b>           | <b>24</b>     | <b>25</b>   | <b>26</b>     | <b>25</b>   | <b>27</b>      | <b>25</b>   | <b>29</b>      | <b>25</b>   | <b>32</b>      | <b>25</b>   | <b>34</b>      | <b>25</b>   |
| Carbohydrate             | 64            | 67          | 52            | 50          | 46             | 42          | 39             | 33          | 22             | 17          | 12             | 8           |
| <b>Fat</b>               | <b>4</b>      | <b>8.3</b>  | <b>12</b>     | <b>25</b>   | <b>16</b>      | <b>33.3</b> | <b>21</b>      | <b>41.7</b> | <b>34</b>      | <b>58.3</b> | <b>41</b>      | <b>66.6</b> |
| Total                    |               | 100         |               | 100         |                | 100         |                | 100         |                | 100         |                | 100         |
| kcal/gm                  | 3.8           |             | 4.2           |             | 4.4            |             | 4.6            |             | 5.2            |             | 6.1            |             |
| <b>Ingredient</b>        | <b>gm</b>     | <b>kcal</b> | <b>gm</b>     | <b>kcal</b> | <b>gm</b>      | <b>kcal</b> | <b>gm</b>      | <b>kcal</b> | <b>gm</b>      | <b>kcal</b> | <b>gm</b>      | <b>kcal</b> |
| Casein                   | 250           | 1000        | 250           | 1000        | 250            | 1000        | 250            | 1000        | 250            | 1000        | 250            | 1000        |
| L-Cystine                | 3.75          | 15          | 3.75          | 15          | 3.75           | 15          | 3.75           | 15          | 3.75           | 15          | 3.75           | 15          |
| Corn Starch              | 515.5         | 2062        | 346.5         | 1386        | 262            | 1048        | 176.5          | 706         | 8              | 32          | 0              | 0           |
| Maltodextrin 10          | 100           | 400         | 100           | 400         | 100            | 400         | 100            | 400         | 100            | 400         | 24             | 96          |
| Sucrose                  | 51            | 204         | 51            | 204         | 51             | 204         | 51             | 204         | 51             | 204         | 51             | 204         |
| Cellulose, BW200         | 50            | 0           | 50            | 0           | 50             | 0           | 50             | 0           | 50             | 0           | 50             | 0           |
| Cocoa Butter             | 10.37         | 93          | 31.25         | 281         | 41.67          | 375         | 52.22          | 470         | 73.03          | 657         | 83.39          | 751         |
| Coconut Oil              | 0.69          | 6           | 2.08          | 19          | 2.78           | 25          | 3.48           | 31          | 4.87           | 44          | 5.56           | 50          |
| Menhaden Oil             | 0.69          | 6           | 2.08          | 19          | 2.78           | 25          | 3.48           | 31          | 4.87           | 44          | 5.56           | 50          |
| Palm Oil                 | 22.8          | 205         | 68.75         | 619         | 91.67          | 825         | 114.89         | 1034        | 160.66         | 1446        | 183.45         | 1651        |
| Safflower Oil            | 2.77          | 25          | 8.33          | 75          | 11.1           | 100         | 13.92          | 125         | 19.47          | 175         | 22.24          | 200         |
| Mineral Mix, S10026      | 10            | 0           | 10            | 0           | 10             | 0           | 10             | 0           | 10             | 0           | 10             | 0           |
| DiCalcium Phosphate      | 13            | 0           | 13            | 0           | 13             | 0           | 13             | 0           | 13             | 0           | 13             | 0           |
| Calcium Carbonate        | 5.5           | 0           | 5.5           | 0           | 5.5            | 0           | 5.5            | 0           | 5.5            | 0           | 5.5            | 0           |
| Potassium Citrate, 1 H2O | 16.5          | 0           | 16.5          | 0           | 16.5           | 0           | 16.5           | 0           | 16.5           | 0           | 16.5           | 0           |
| Vitamin Mix, V10001      | 10            | 40          | 10            | 40          | 10             | 40          | 10             | 40          | 10             | 40          | 10             | 40          |
| Choline Bitartrate       | 2             | 0           | 2             | 0           | 2              | 0           | 2              | 0           | 2              | 0           | 2              | 0           |
| FD&C Yellow Dye #5       | 0             | 0           | 0             | 0           | 0              | 0           | 0              | 0           | 0              | 0           | 0              | 0           |
| FD&C Red Dye #40         | 0             | 0           | 0             | 0           | 0              | 0           | 0              | 0           | 0              | 0           | 0              | 0           |
| FD&C Blue Dye #1         | 0.0125        | 0           | 0.05          | 0           | 0.075          | 0           | 0.125          | 0           | 0.175          | 0           | 0.225          | 0           |
| <b>Total</b>             | <b>1064.6</b> | <b>4057</b> | <b>970.79</b> | <b>4057</b> | <b>923.83</b>  | <b>4057</b> | <b>876.37</b>  | <b>4057</b> | <b>782.83</b>  | <b>4057</b> | <b>736.18</b>  | <b>4057</b> |
